# Supplementary material
Source: PubMed Central journal article supplement (PMC3346475)
Supplement: supp_78.9.3317_AEM-AEM07816-11-s01.pdf [file supp_78.9.3317_AEM-AEM07816-11-s01.pdf]

TABLE S1. Phenotypic characteristics of *M. osloensis* strains and group A isolates

|                                | <i>M. osloensis</i><br>Type strain and reference strain <sup>a</sup> | Group A strains<br>(4 isolates) <sup>b</sup> |
|--------------------------------|----------------------------------------------------------------------|----------------------------------------------|
| Gram stain                     | -                                                                    | -                                            |
| Morphology                     | Rod                                                                  | Rod                                          |
| Motility                       | -                                                                    | -                                            |
| Oxygen condition               | Aerobic                                                              | Aerobic                                      |
| Growth on SCD agar             | +                                                                    | +                                            |
| Hemolysis                      | -                                                                    | -                                            |
| Catalase test                  | +                                                                    | +                                            |
| Oxidase                        | +                                                                    | +                                            |
| API-ZYM                        |                                                                      |                                              |
| Alkaline phosphatase           | +                                                                    | +                                            |
| Esterase (C 4)                 | +                                                                    | +                                            |
| Esterase Lipase (C 8)          | +                                                                    | +                                            |
| Lipase (C 14)                  | -                                                                    | -                                            |
| Leucine arylamidase            | +                                                                    | +                                            |
| Valine arylamidase             | d(1/2)                                                               | d(3/4)                                       |
| Cystine arylamidase            | d(1/2)                                                               | -                                            |
| Trypsin                        | -                                                                    | -                                            |
| Chymotrypsin                   | -                                                                    | -                                            |
| Acid phosphatase               | +                                                                    | +                                            |
| Naphthol-AS-BIphosphohydrolase | +                                                                    | +                                            |
| -Galactosidase                 | -                                                                    | -                                            |
| -Galactosidase                 | -                                                                    | -                                            |
| -Glucuronidase                 | -                                                                    | -                                            |
| -Glucosidase                   | -                                                                    | -                                            |
| -Glucosidase                   | -                                                                    | -                                            |
| N-acetyl-b-glucosaminidase     | -                                                                    | -                                            |
| -Mannosidase                   | -                                                                    | -                                            |
| -Fucosidase                    | -                                                                    | -                                            |

+, positive; -, negative; d, variable. The numbers in parentheses are the numbers of positive strain(s)/test strains.

<sup>a</sup>, CCUG350T (=ATCC19976T) and NCIMB 10693

<sup>b</sup>, KMC41, KMC43, KMC44, and KMC46

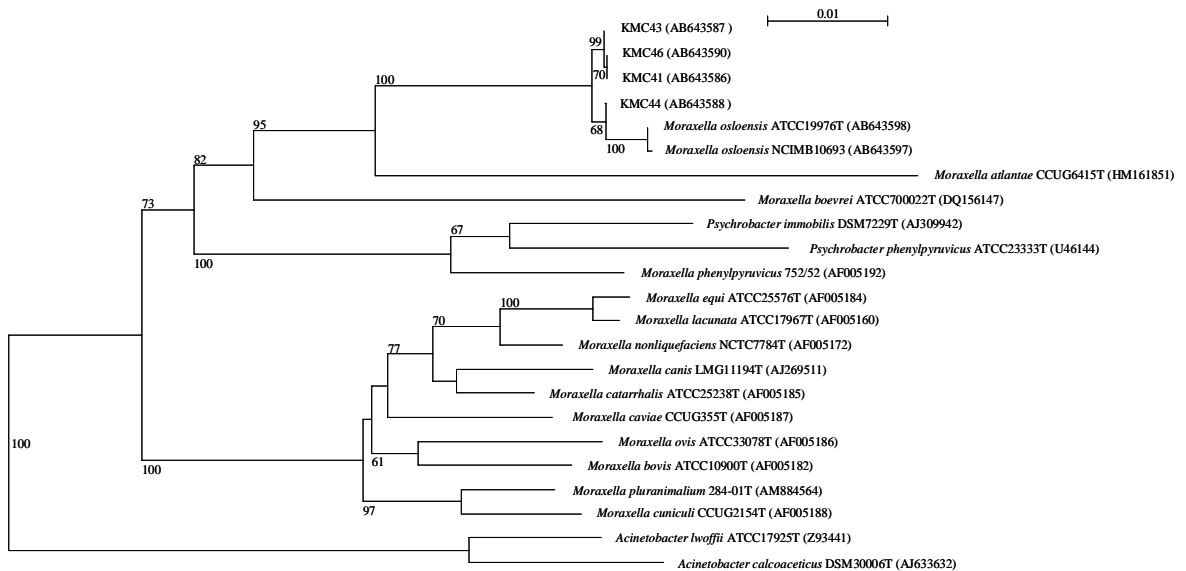

FIG. S1. Phylogenetic tree based on 16S rRNA gene. Sequence comparison by the neighbor-joining algorithm showing the relationships between the four isolates of *Moraxella osloensis* and other reference species of the genus *Moraxella*. Bootstrap values (expressed as a percentage of 1000 replications) are given at the branching points. *Acinetobacter calcoaceticus* DSM30006T was used as an outgroup. Bar shows 0.01% sequence divergence.
